# Supplementary material for: Propene adsorption on gold–palladium nanoalloys supported on bundle nanotubes
Source: Royal Society of Chemistry journal article supplement (doi:10.1039/c6ra12350c), 2016-01-01
Supplement: c6ra12350c1.pdf [file c6ra12350c1.pdf]

### Supporting information:

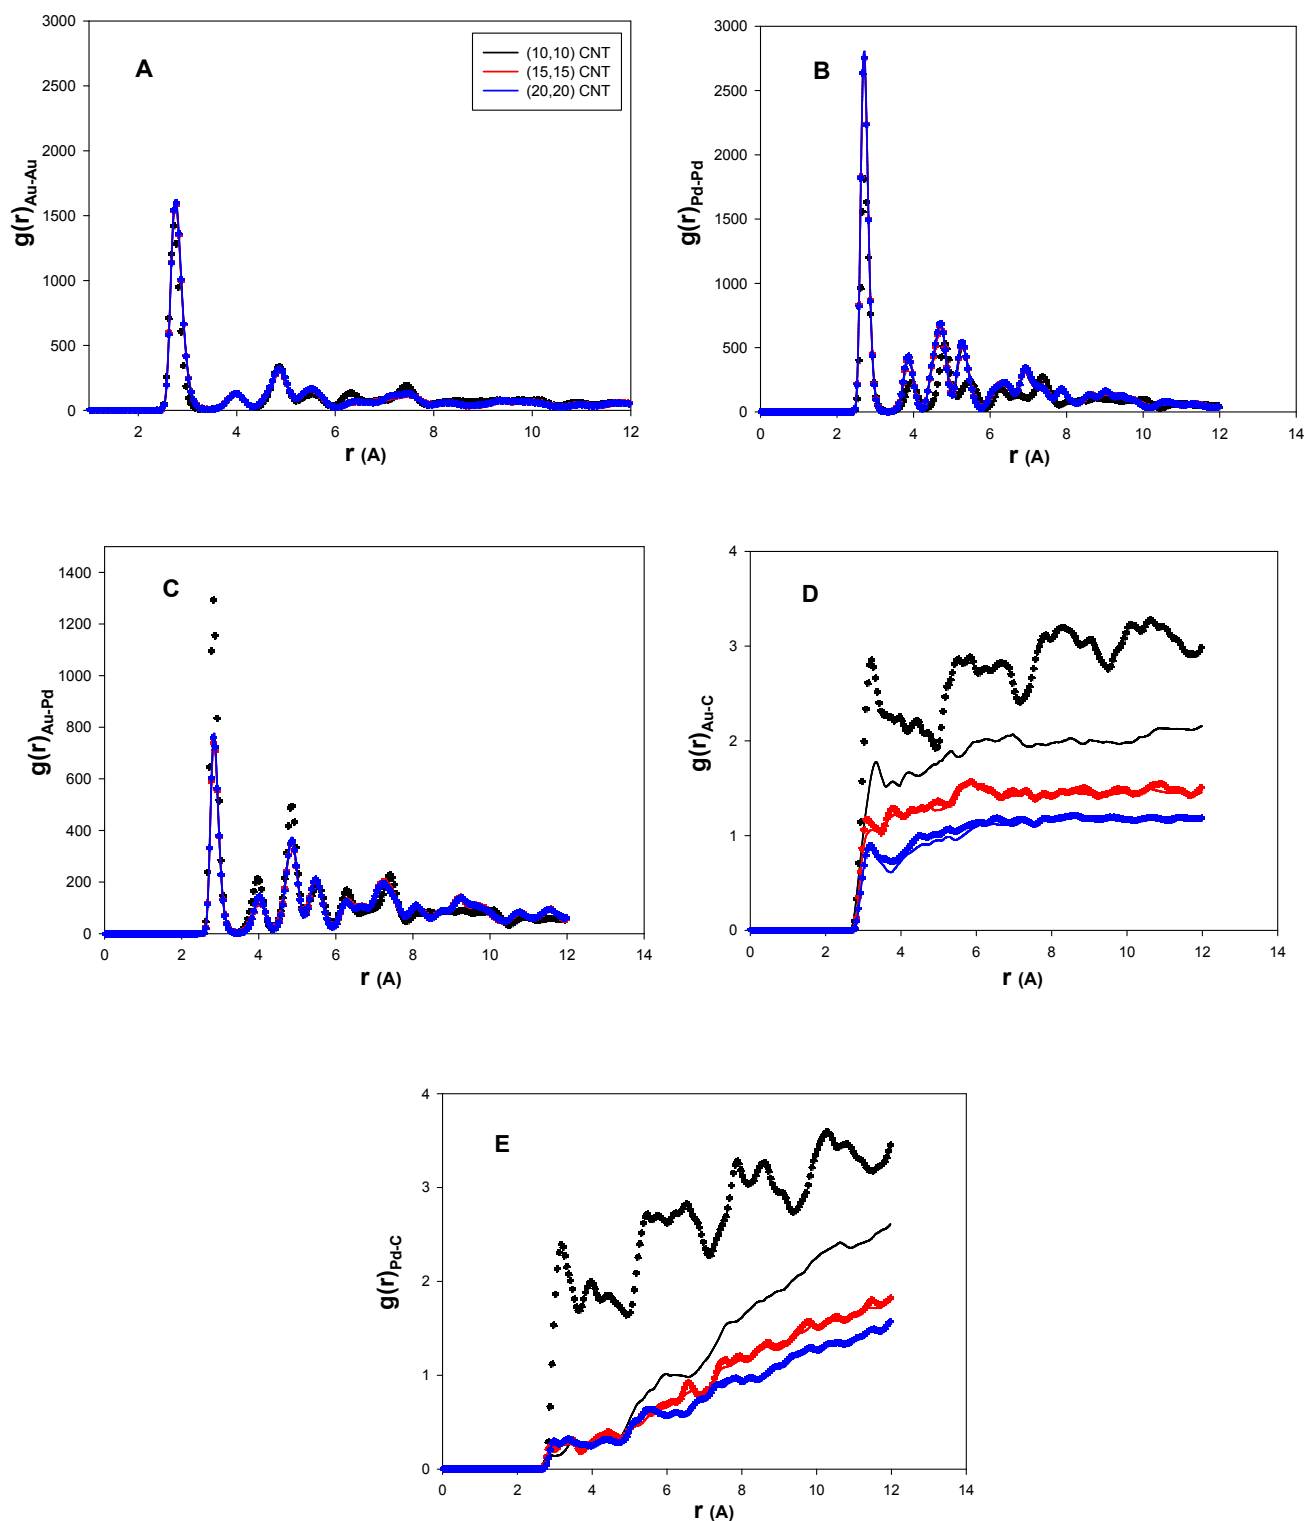

**Fig. S1:** The different RDFs on the (Au-Pd)<sub>256</sub> nanoalloy with the  $x_{Au}=0.5$  supported on the CNT bundles with the different diameters in vacuum (solid lines) and in vacuum after removing the propene molecules (cross points).

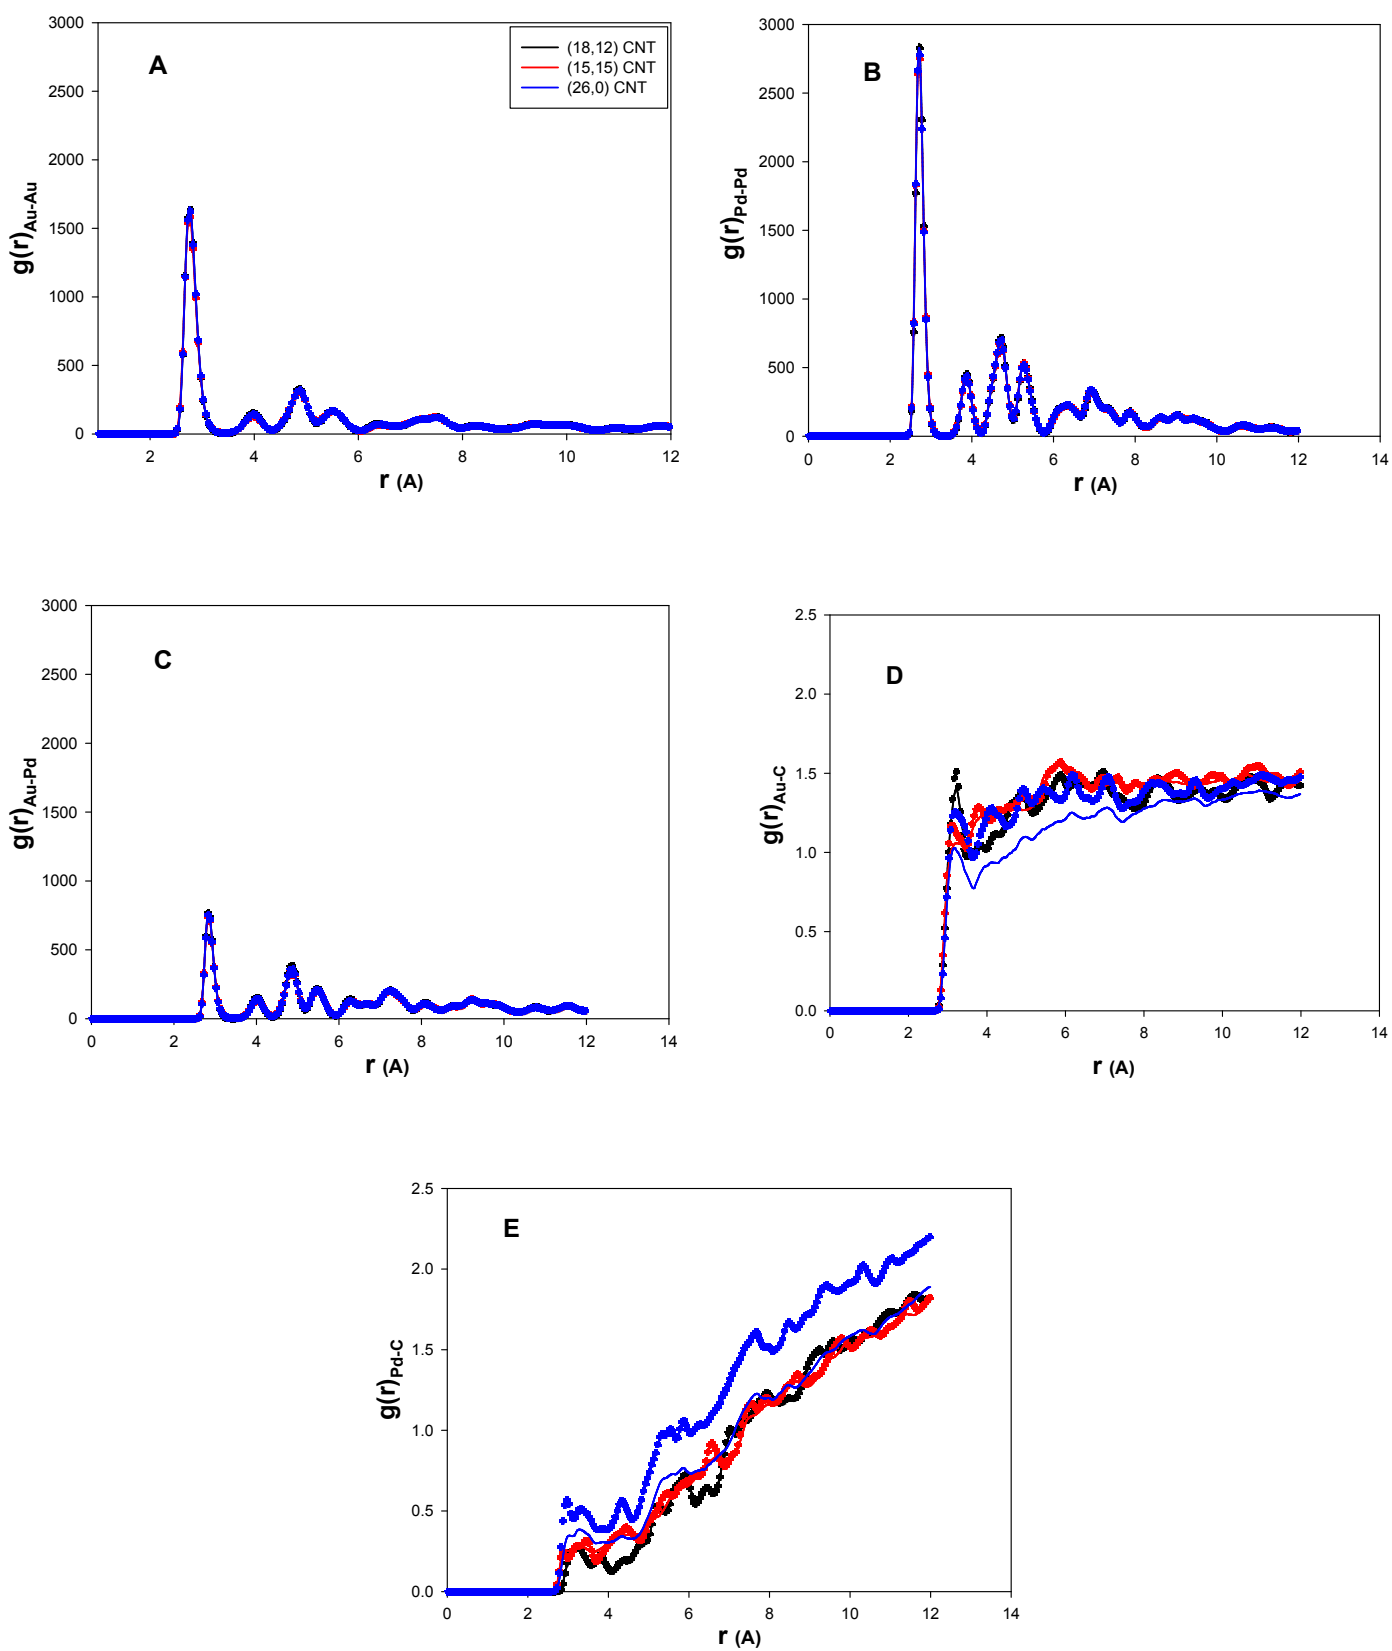

**Fig. S2.** The different RDFs for the nanoalloy with  $x_{\text{Au}} = 0.5$  supported on the nanotube bundles with the different chiralities.

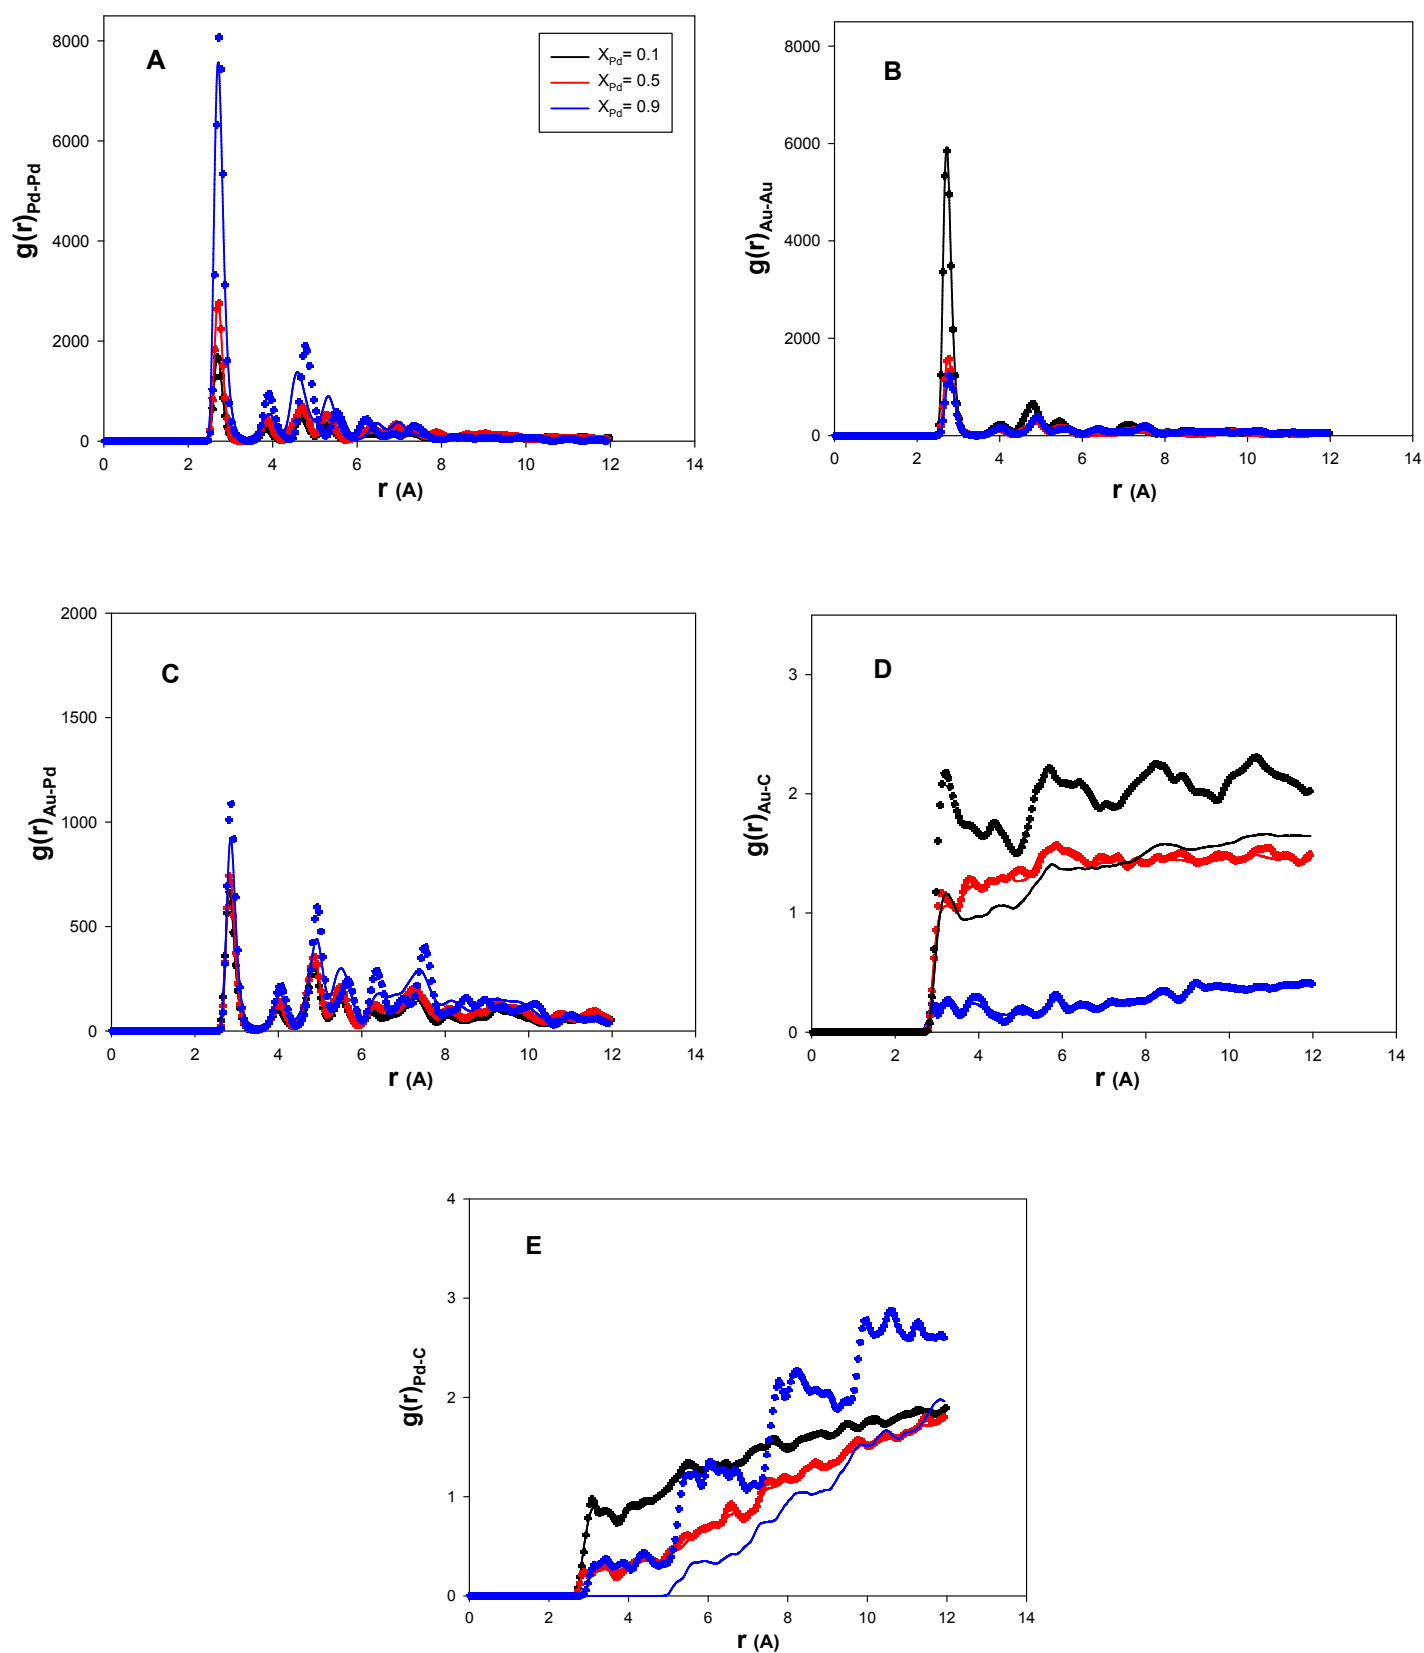

**Fig. S3.** The different RDFs for the supported nanoalloys with the different mole fractions.

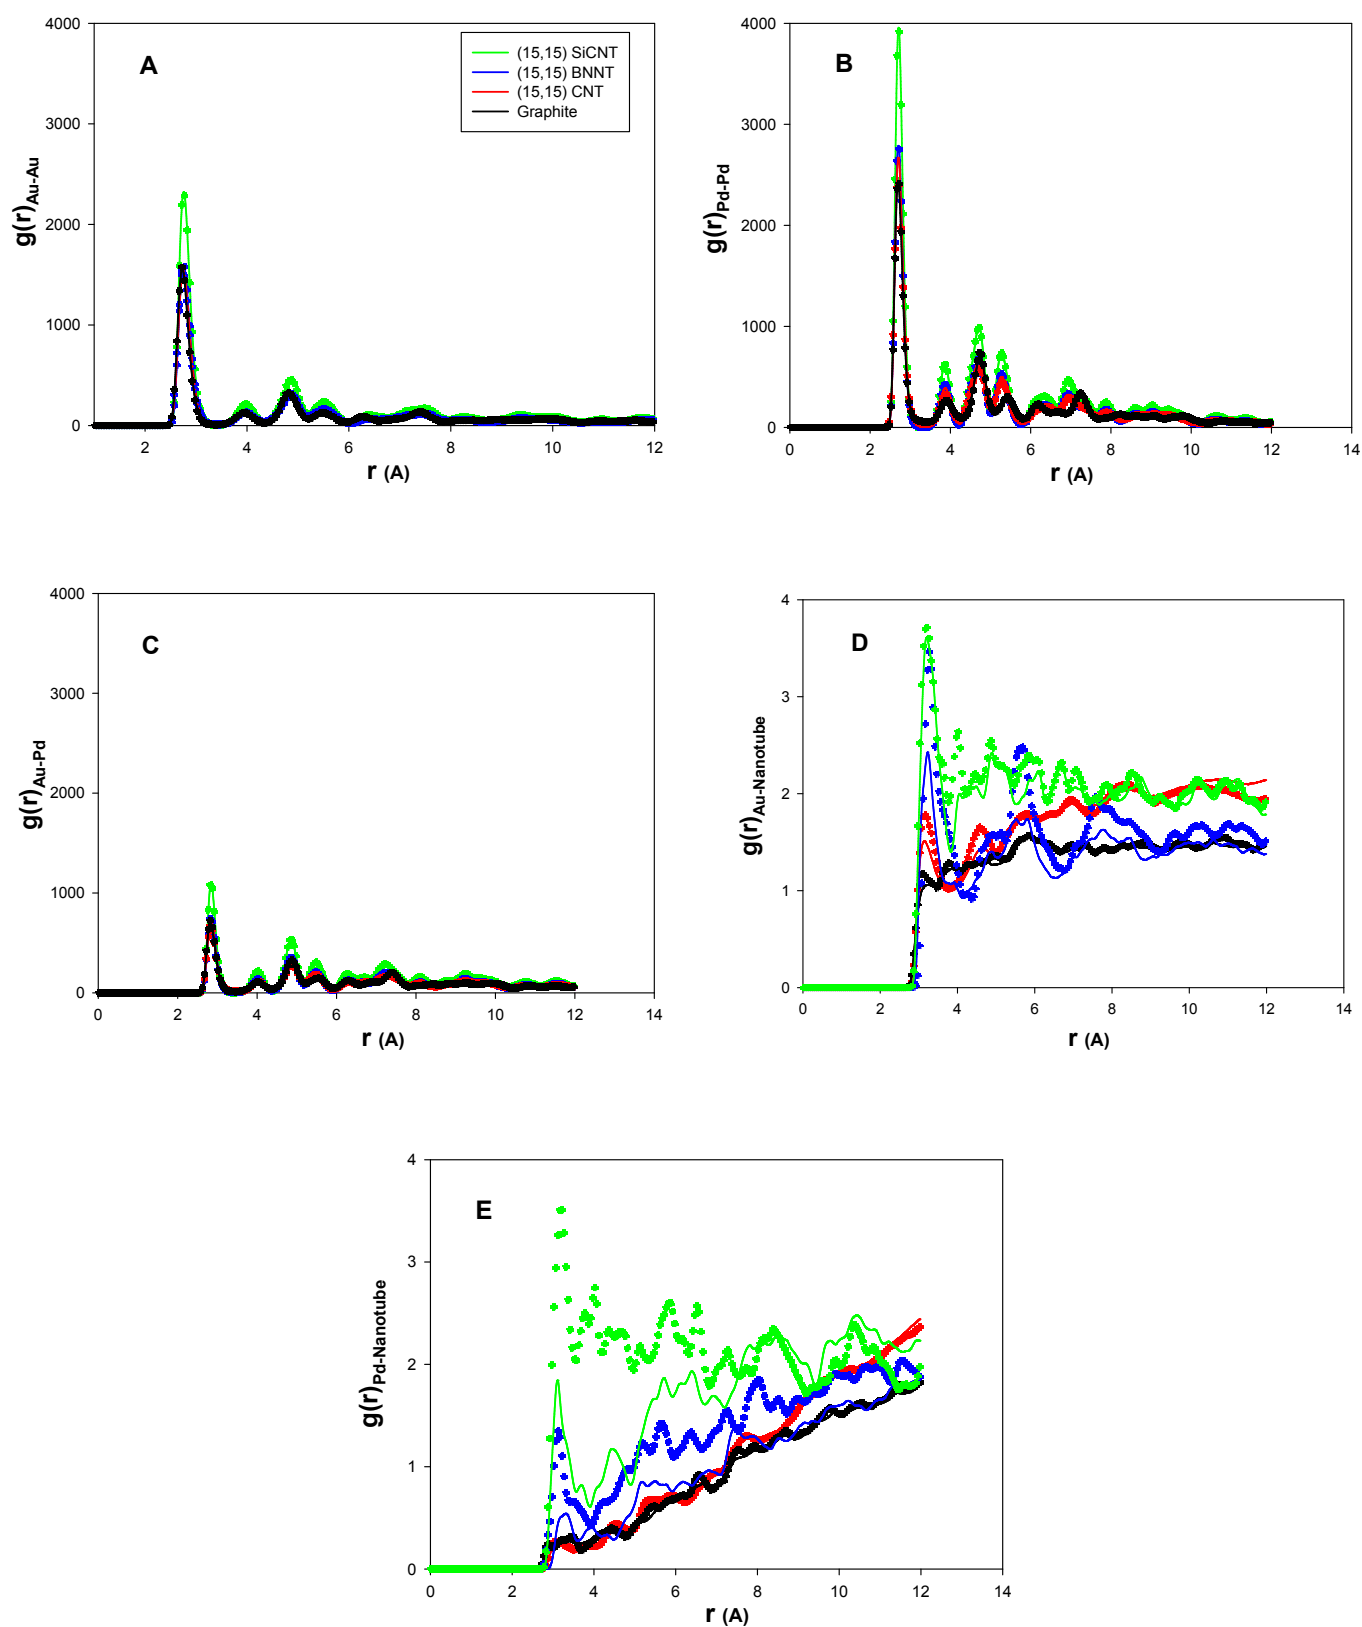

**Fig. S4.** The different RDFs for the  $(\text{Pd-Au})_{256}$  nanoalloy deposited on the different supports.
